# Supplementary material for: Murine Gamma Herpesvirus 68 Hijacks MAVS and IKKβ to Abrogate NFκB Activation and Antiviral Cytokine Production
Source: PubMed Central journal article supplement (PMC3213086; doi:10.1371/journal.ppat.1002336), 2011-11-10

Figure S8

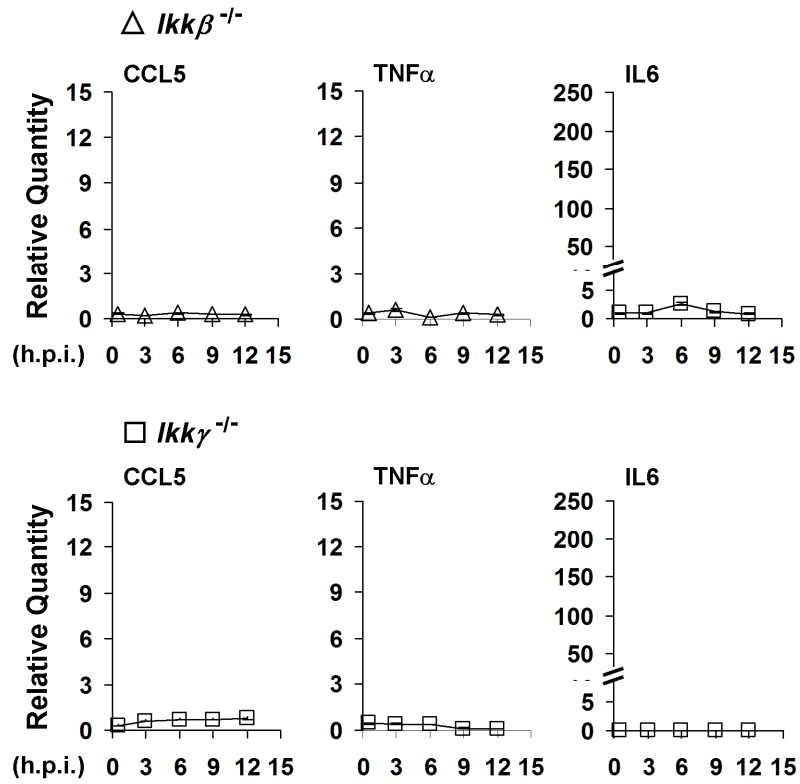

Supplement: ppat.1002336.s008.pdf [file ppat.1002336.s008.pdf]
