# Supplementary material for: Murine Gamma Herpesvirus 68 Hijacks MAVS and IKKβ to Abrogate NFκB Activation and Antiviral Cytokine Production
Source: PLOS journal article supplement (doi:10.1371/journal.ppat.1002336), 2011-11-10

Figure S10

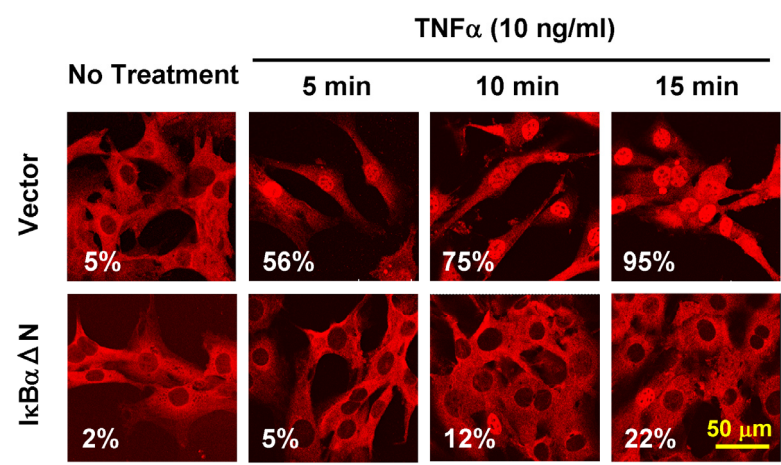

Supplement: S10 (10.1371/journal.ppat.1002336.s010) [file journal.ppat.1002336.s010]
